# Supplementary material for: Re-evaluating the phylogenetic position of the enigmatic early Cambrian deuterostome Yanjiahella
Source: Springer Nature journal article supplement (doi:10.1038/s41467-020-14920-x), 2020-03-09
Supplement: MOESM2 [file 41467_2020_14920_MOESM2_ESM.pdf › supplementary_information/41467_2020_14920_MOESM2_ESM.pdf]

## **Description of Additional Supplementary Files**

File Name: Supplementary Data 1

Description: Batch file containing the data and scripts to run the analyses.
